# Supplementary material for: Breakfast Consumption Habits at Age 6 and Cognitive Ability at Age 12: A Longitudinal Cohort Study
Source: MDPI journal article supplement (doi:10.3390/nu13062080), 2021-06-17
Supplement: s1 [file s1]

**Table S1.** Crude associations of IQ scores/academic achievement with baseline characteristics

|                                    | VIQ            |         | PIQ            |         | FIQ            |         | Academic achievement |         |
|------------------------------------|----------------|---------|----------------|---------|----------------|---------|----------------------|---------|
|                                    | raw coef (SE)  | P-value | raw coef (SE)  | P-value | raw coef (SE)  | P-value | raw coef (SE)        | P-value |
| Sex (male)                         | 1.878 (0.919)  | 0.041   | 3.926 (0.910)  | <0.001  | 3.253 (0.913)  | <0.001  | -0.378 (0.067)       | <0.001  |
| Fathers' education                 |                |         |                |         |                |         |                      |         |
| High school                        | 3.970 (1.072)  | <0.001  | 2.390 (1.098)  | 0.030   | 3.890 (1.067)  | <0.001  | 0.033 (0.083)        | 0.685   |
| College or higher                  | 8.951 (1.105)  | <0.001  | 5.488 (1.133)  | <0.001  | 8.565 (1.102)  | <0.001  | 0.313 (0.084)        | <0.001  |
| Mothers' education                 |                |         |                |         |                |         |                      |         |
| High school                        | 5.506 (1.030)  | <0.001  | 3.599 (1.062)  | <0.001  | 5.511 (1.030)  | <0.001  | 0.028 (0.078)        | 0.721   |
| College or higher                  | 9.192 (1.193)  | <0.001  | 4.907 (1.230)  | <0.001  | 8.375 (1.193)  | <0.001  | 0.330 (0.089)        | <0.001  |
| Fathers' occupation                |                |         |                |         |                |         |                      |         |
| Unemployed                         | -6.611 (2.275) | 0.004   | -4.800 (2.255) | 0.034   | -6.843 (2.239) | 0.002   | -0.283 (0.198)       | 0.153   |
| Labor Worker                       | -5.170 (0.981) | <0.001  | -3.823 (0.972) | <0.001  | -5.337 (0.966) | <0.001  | -0.125 (0.072)       | 0.085   |
| Mother's occupation                |                |         |                |         |                |         |                      |         |
| Unemployed                         | -5.713 (1.242) | <0.001  | -4.031 (1.240) | 0.001   | -5.813 (1.222) | <0.001  | -0.144 (0.092)       | 0.117   |
| Worker                             | -6.076 (1.117) | <0.001  | -5.024 (1.116) | <0.001  | -6.512 (1.101) | <0.001  | -0.204 (0.081)       | 0.012   |
| Parents divorced or separated (no) | 1.963 (2.824)  | 0.487   | -1.206 (2.861) | 0.673   | 1.161 (2.913)  | 0.691   | 0.215 (0.217)        | 0.322   |
| Maternal age at childbirth         | 0.236 (0.174)  | 0.175   | 0.277 (0.172)  | 0.108   | 0.330 (0.173)  | 0.057   | -0.001 (0.012)       | 0.935   |
| Infant feeding method              |                |         |                |         |                |         |                      |         |
| Breastfeeding                      | 3.473 (2.009)  | 0.084   | 3.152 (2.017)  | 0.119   | 3.722 (2.004)  | 0.064   | 0.296 (0.139)        | 0.033   |
| Breastfeeding duration             | -0.023 (0.157) | 0.884   | -0.261 (0.158) | 0.099   | -0.139 (0.157) | 0.376   | -0.029 (0.012)       | 0.013   |
| Home location                      |                |         |                |         |                |         |                      |         |
| Rural                              | -4.306 (1.438) | 0.003   | -4.531 (1.426) | 0.002   | -5.415 (1.424) | <0.001  | -0.165 (0.105)       | 0.117   |
| Small Town                         | -3.631 (1.208) | 0.003   | -4.163 (1.198) | <0.001  | -4.655 (1.190) | <0.001  | -0.067 (0.095)       | 0.481   |
| Living space per person (m2)       | -0.024 (0.035) | 0.488   | -0.043 (0.035) | 0.214   | -0.036 (0.035) | 0.296   | -0.001 (0.003)       | 0.785   |
| Siblings                           |                |         |                |         |                |         |                      |         |
| Have at least one sibling          | -5.418 (1.217) | <0.001  | -1.054 (1.211) | 0.385   | -3.664 (1.211) | 0.003   | -0.272 (0.090)       | 0.003   |

Reference groups used in GLM analysis were: female (gender), less than high school (education), professional (occupation), yes (parent's divorce or separation), formula (feed type during infancy), city (home location), and no siblings (siblings).
